# Supplementary material
Source: MDPI journal article supplement (https://www.mdpi.com/2071-1050/12/5/1918)
Supplement: s1 [file s1]

new

|                  |                                          |
|------------------|------------------------------------------|
| Name of function | FRAM Function                            |
| Description      | A generic FRAM function with five inputs |
| Aspect           | Description of Aspect                    |
| Input            |                                          |
| Output           |                                          |
| Precondition     |                                          |
| Resource         |                                          |
| Control          |                                          |
| Time             |                                          |









**MATLAB Code for the IVF functions (reduced with rough sets):**

```
[System]
Name='IVF'
Type='mamdani'
Version=2.0
NumInputs=8
NumOutputs=1
NumRules=154
AndMethod='min'
OrMethod='max'
ImpMethod='min'
AggMethod='max'
DefuzzMethod='centroid'

[Input1]
Name='Availability.of.recources'
Range=[0 10]
NumMFs=2
MF1='Inadequate':'trimf',[0 0 10]
MF2='Adequate':'trimf',[0 10 10]

[Input2]
Name='Number.of.goals.and.conflict.resolution'
Range=[0 10]
NumMFs=2
MF1='Inadequate':'trimf',[0 0 10]
MF2='Adequate':'trimf',[0 10 10]

[Input3]
Name='Quality.of.communication'
Range=[0 10]
NumMFs=2
MF1='Inadequate':'trimf',[0 0 10]
MF2='Adequate':'trimf',[0 10 10]

[Input4]
Name='Availability.of.procedures.and.plans'
Range=[0 10]
NumMFs=2
MF1='Inadequate':'trimf',[0 0 10]
MF2='Adequate':'trimf',[0 10 10]

[Input5]
Name='Training.and.competence'
Range=[0 10]
NumMFs=2
MF1='Inadequate':'trimf',[0 0 10]
MF2='Adequate':'trimf',[0 10 10]

[Input6]
Name='Available.time.and.time.pressure'
Range=[0 10]
NumMFs=2
MF1='Inadequate':'trimf',[0 0 10]
```

MF2='Adequate': 'trimf', [0 10 10]

[Input7]

Name='Circadian.rhythm.and.stress'

Range=[0 10]

NumMFs=2

MF1='Inadequate': 'trimf', [0 0 10]

MF2='Adequate': 'trimf', [0 10 10]

[Input8]

Name='Team.collaboration.quality'

Range=[0 10]

NumMFs=2

MF1='Inadequate': 'trimf', [0 0 10]

MF2='Adequate': 'trimf', [0 10 10]

[Output1]

Name='IVF'

Range=[0 1.5]

NumMFs=3

MF1='Highly.variable': 'trimf', [0 0 0.75]

MF2='Variable': 'trimf', [0.5 0.75 1]

MF3='Non.variable': 'trimf', [0.75 1.5 1.5]

[Rules]

1 0 0 1 1 1 0 0, 1 (1) : 1  
0 1 0 0 1 1 1 0, 1 (1) : 1  
1 0 1 0 1 1 0 0, 1 (1) : 1  
0 0 1 1 0 1 1 0, 1 (1) : 1  
1 0 1 1 0 1 0 0, 1 (1) : 1  
1 0 1 0 0 1 1 0, 1 (1) : 1  
0 0 1 1 1 0 1 0, 1 (1) : 1  
0 1 0 1 0 1 1 0, 1 (1) : 1  
0 1 1 1 0 0 1 0, 1 (1) : 1  
0 1 0 1 1 0 1 0, 1 (1) : 1  
0 1 0 1 1 1 0 0, 1 (1) : 1  
1 0 0 1 1 0 1 0, 1 (1) : 1  
1 0 1 1 0 0 1 0, 1 (1) : 1  
0 0 1 1 1 1 0 0, 1 (1) : 1  
1 1 0 0 0 1 1 0, 1 (1) : 1  
1 0 1 0 1 0 1 0, 1 (1) : 1  
1 1 0 1 0 0 1 0, 1 (1) : 1  
0 1 1 0 1 1 0 0, 1 (1) : 1  
1 1 0 0 1 1 0 0, 1 (1) : 1  
1 1 1 0 0 1 0 0, 1 (1) : 1  
0 1 1 0 0 1 1 0, 1 (1) : 1  
1 1 0 1 0 1 0 0, 1 (1) : 1  
1 1 1 0 0 0 1 0, 1 (1) : 1  
0 1 1 1 1 0 0 0, 1 (1) : 1  
0 0 0 1 1 1 1 0, 1 (1) : 1  
1 1 0 1 1 0 0 0, 1 (1) : 1  
1 1 1 0 1 0 0 0, 1 (1) : 1  
1 0 1 1 1 0 0 0, 1 (1) : 1  
1 1 0 0 1 0 1 0, 1 (1) : 1  
1 0 0 1 0 1 1 0, 1 (1) : 1  
0 1 1 0 1 0 1 0, 1 (1) : 1

0 0 1 0 1 1 1 0, 1 (1) : 1  
0 1 1 1 0 1 0 0, 1 (1) : 1  
1 0 0 0 1 1 1 0, 1 (1) : 1  
1 1 1 1 0 0 0 0, 1 (1) : 1  
1 0 0 1 1 0 0 1, 1 (1) : 1  
0 1 1 1 0 0 0 1, 1 (1) : 1  
1 1 1 0 0 0 0 1, 1 (1) : 1  
0 1 0 1 1 0 0 1, 1 (1) : 1  
0 0 1 1 1 0 0 1, 1 (1) : 1  
1 1 0 1 0 0 0 1, 1 (1) : 1  
0 1 0 0 1 1 0 1, 1 (1) : 1  
1 0 1 0 0 1 0 1, 1 (1) : 1  
1 1 0 0 0 1 0 1, 1 (1) : 1  
1 0 0 0 1 1 0 1, 1 (1) : 1  
0 1 0 1 0 1 0 1, 1 (1) : 1  
1 1 0 0 1 0 0 1, 1 (1) : 1  
0 0 0 1 1 1 0 1, 1 (1) : 1  
0 1 1 0 1 0 0 1, 1 (1) : 1  
0 0 1 0 1 1 0 1, 1 (1) : 1  
0 0 1 1 0 1 0 1, 1 (1) : 1  
1 0 1 1 0 0 0 1, 1 (1) : 1  
0 1 1 0 0 1 0 1, 1 (1) : 1  
1 0 1 0 1 0 0 1, 1 (1) : 1  
1 0 0 1 0 1 0 1, 1 (1) : 1  
0 0 1 1 0 0 1 1, 1 (1) : 1  
0 1 1 0 0 0 1 1, 1 (1) : 1  
0 1 0 0 1 0 1 1, 1 (1) : 1  
1 1 0 0 0 0 1 1, 1 (1) : 1  
0 0 0 1 1 0 1 1, 1 (1) : 1  
1 0 0 1 0 0 1 1, 1 (1) : 1  
1 0 1 0 0 0 1 1, 1 (1) : 1  
0 1 0 1 0 0 1 1, 1 (1) : 1  
0 0 1 0 1 0 1 1, 1 (1) : 1  
1 0 0 0 1 0 1 1, 1 (1) : 1  
0 1 0 0 0 1 1 1, 1 (1) : 1  
1 0 0 0 0 1 1 1, 1 (1) : 1  
0 0 0 1 0 1 1 1, 1 (1) : 1  
0 0 1 0 0 1 1 1, 1 (1) : 1  
0 0 0 0 1 1 1 1, 1 (1) : 1  
1 1 1 2 2 2 2 2, 2 (1) : 1  
1 1 2 1 2 2 2 2, 2 (1) : 1  
1 1 2 2 1 2 2 2, 2 (1) : 1  
1 1 2 2 2 1 2 2, 2 (1) : 1  
1 1 2 2 2 2 1 2, 2 (1) : 1  
1 1 2 2 2 2 2 1, 2 (1) : 1  
1 2 1 1 2 2 2 2, 2 (1) : 1  
1 2 1 2 1 2 2 2, 2 (1) : 1  
1 2 1 2 2 1 2 2, 2 (1) : 1  
1 2 1 2 2 2 1 2, 2 (1) : 1  
1 2 1 2 2 2 2 1, 2 (1) : 1  
1 2 2 1 1 2 2 2, 2 (1) : 1  
1 2 2 1 2 1 2 2, 2 (1) : 1  
1 2 2 1 2 2 1 2, 2 (1) : 1  
1 2 2 1 2 2 2 1, 2 (1) : 1  
1 2 2 2 1 1 2 2, 2 (1) : 1  
1 2 2 2 1 2 1 2, 2 (1) : 1  
1 2 2 2 1 2 2 1, 2 (1) : 1



1 2 2 2 2 1 1 2, 2 (1) : 1  
1 2 2 2 2 1 2 1, 2 (1) : 1  
1 2 2 2 2 2 1 1, 2 (1) : 1  
2 1 1 1 2 2 2 2, 2 (1) : 1  
2 1 1 2 1 2 2 2, 2 (1) : 1  
2 1 1 2 2 1 2 2, 2 (1) : 1  
2 1 1 2 2 2 1 2, 2 (1) : 1  
2 1 1 2 2 2 2 1, 2 (1) : 1  
2 1 2 1 1 2 2 2, 2 (1) : 1  
2 1 2 1 2 1 2 2, 2 (1) : 1  
2 1 2 1 2 2 1 2, 2 (1) : 1  
2 1 2 1 2 2 2 1, 2 (1) : 1  
2 1 2 2 1 1 2 2, 2 (1) : 1  
2 1 2 2 1 2 1 2, 2 (1) : 1  
2 1 2 2 1 2 2 1, 2 (1) : 1  
2 1 2 2 2 1 1 2, 2 (1) : 1  
2 1 2 2 2 1 2 1, 2 (1) : 1  
2 1 2 2 2 2 1 1, 2 (1) : 1  
2 2 1 1 1 2 2 2, 2 (1) : 1  
2 2 1 1 2 1 2 2, 2 (1) : 1  
2 2 1 1 2 2 1 2, 2 (1) : 1  
2 2 1 1 2 2 2 1, 2 (1) : 1  
2 2 1 2 1 1 2 2, 2 (1) : 1  
2 2 1 2 1 2 1 2, 2 (1) : 1  
2 2 1 2 1 2 2 1, 2 (1) : 1  
2 2 1 2 2 1 1 2, 2 (1) : 1  
2 2 1 2 2 1 2 1, 2 (1) : 1  
2 2 1 2 2 2 1 1, 2 (1) : 1  
2 2 2 1 1 2 1 2, 2 (1) : 1  
2 2 2 1 1 2 2 1, 2 (1) : 1  
2 2 2 1 2 1 1 2, 2 (1) : 1  
2 2 2 1 2 1 2 1, 2 (1) : 1  
2 2 2 1 2 2 1 1, 2 (1) : 1  
2 2 2 2 1 1 1 2, 2 (1) : 1  
2 2 2 2 1 1 2 1, 2 (1) : 1  
2 2 2 2 1 2 1 1, 2 (1) : 1  
2 2 2 2 2 1 1 1, 2 (1) : 1  
0 0 2 2 2 2 2 2, 3 (1) : 1  
0 2 0 2 2 2 2 2, 3 (1) : 1  
0 2 2 0 2 2 2 2, 3 (1) : 1  
0 2 2 2 0 2 2 2, 3 (1) : 1  
0 2 2 2 2 0 2 2, 3 (1) : 1  
0 2 2 2 2 2 0 2, 3 (1) : 1  
0 2 2 2 2 2 2 0, 3 (1) : 1  
2 0 0 2 2 2 2 2, 3 (1) : 1  
2 0 2 0 2 2 2 2, 3 (1) : 1  
2 0 2 2 0 2 2 2, 3 (1) : 1  
2 0 2 2 2 0 2 2, 3 (1) : 1  
2 0 2 2 2 2 0 2, 3 (1) : 1  
2 0 2 2 2 2 2 0, 3 (1) : 1  
2 2 0 0 2 2 2 2, 3 (1) : 1  
2 2 0 2 0 2 2 2, 3 (1) : 1  
2 2 0 2 2 0 2 2, 3 (1) : 1  
2 2 0 2 2 2 0 2, 3 (1) : 1  
2 2 0 2 2 2 2 0, 3 (1) : 1  
2 2 2 0 0 2 2 2, 3 (1) : 1

2 2 2 0 2 0 2 2, 3 (1) : 1  
2 2 2 0 2 2 0 2, 3 (1) : 1  
2 2 2 0 2 2 2 0, 3 (1) : 1  
2 2 2 2 0 0 2 2, 3 (1) : 1  
2 2 2 2 0 2 0 2, 3 (1) : 1  
2 2 2 2 0 2 2 0, 3 (1) : 1  
2 2 2 2 2 0 0 2, 3 (1) : 1  
2 2 2 2 2 0 2 0, 3 (1) : 1  
2 2 2 2 2 2 0 0, 3 (1) : 1







|              |              |              |                 |                 |                 |
|--------------|--------------|--------------|-----------------|-----------------|-----------------|
| non-variable | non-variable | variable     | highly variable | variable        | highly variable |
| non-variable | non-variable | variable     | highly variable | non-variable    | variable        |
| non-variable | non-variable | variable     | variable        | highly variable | highly variable |
| non-variable | non-variable | variable     | variable        | variable        | variable        |
| non-variable | non-variable | variable     | variable        | non-variable    | non-variable    |
| non-variable | non-variable | variable     | non-variable    | highly variable | variable        |
| non-variable | non-variable | variable     | non-variable    | variable        | non-variable    |
| non-variable | non-variable | variable     | non-variable    | non-variable    | non-variable    |
| non-variable | non-variable | non-variable | highly variable | highly variable | highly variable |
| non-variable | non-variable | non-variable | highly variable | variable        | variable        |
| non-variable | non-variable | non-variable | highly variable | non-variable    | non-variable    |
| non-variable | non-variable | non-variable | variable        | highly variable | variable        |
| non-variable | non-variable | non-variable | variable        | variable        | non-variable    |
| non-variable | non-variable | non-variable | variable        | non-variable    | non-variable    |
| non-variable | non-variable | non-variable | non-variable    | highly variable | non-variable    |
| non-variable | non-variable | non-variable | non-variable    | variable        | non-variable    |
| non-variable | non-variable | non-variable | non-variable    | non-variable    | non-variable    |

**MATLAB code for a generic FRAM function with five inputs or aspects and one output (not reduced with rough sets):**

```
[System]
Name='A generic FRAM Function - not reduced'
Type='mamdani'
Version=2.0
NumInputs=5
NumOutputs=1
NumRules=243
AndMethod='min'
OrMethod='max'
ImpMethod='min'
AggMethod='max'
DefuzzMethod='centroid'
```

```
[Input1]
Name='Input_1'
Range=[0 1.5]
NumMFs=3
MF1='Highly.variable':'trimf',[0 0 0.75]
MF2='Variable':'trimf',[0.5 0.75 1]
MF3='Non.variable':'trimf',[0.75 1.5 1.5]
```

```
[Input2]
Name='Input_2'
Range=[0 1.5]
NumMFs=3
MF1='Highly.variable':'trimf',[0 0 0.75]
MF2='Variable':'trimf',[0.5 0.75 1]
MF3='Non.variable':'trimf',[0.75 1.5 1.5]
```

```
[Input3]
Name='Input_3'
Range=[0 1.5]
NumMFs=3
MF1='Highly.variable':'trimf',[0 0 0.75]
MF2='Variable':'trimf',[0.5 0.75 1]
MF3='Non.variable':'trimf',[0.75 1.5 1.5]
```

```
[Input4]
Name='Input_4'
Range=[0 1.5]
NumMFs=3
MF1='Highly.variable':'trimf',[0 0 0.75]
MF2='Variable':'trimf',[0.5 0.75 1]
MF3='Non.variable':'trimf',[0.75 1.5 1.5]
```

```
[Input5]
Name='IVF'
Range=[0 1.5]
NumMFs=3
MF1='Highly.variable':'trimf',[0 0 0.75]
MF2='Variable':'trimf',[0.5 0.75 1]
```

MF3='Non.variable': 'trimf', [0.75 1.5 1.5]

[Output1]

Name='Output\_1'

Range=[0 1.5]

NumMFs=3

MF1='Highly.variable': 'trimf', [0 0 0.75]

MF2='Variable': 'trimf', [0.5 0.75 1]

MF3='Non.variable': 'trimf', [0.75 1.5 1.5]

[Rules]

1 1 1 1 1, 1 (1) : 1  
1 1 1 1 2, 1 (1) : 1  
1 1 1 1 3, 1 (1) : 1  
1 1 1 2 1, 1 (1) : 1  
1 1 1 2 2, 1 (1) : 1  
1 1 1 2 3, 1 (1) : 1  
1 1 1 3 1, 1 (1) : 1  
1 1 1 3 2, 1 (1) : 1  
1 1 1 3 3, 1 (1) : 1  
1 1 2 1 1, 1 (1) : 1  
1 1 2 1 2, 1 (1) : 1  
1 1 2 1 3, 1 (1) : 1  
1 1 2 2 1, 1 (1) : 1  
1 1 2 2 2, 1 (1) : 1  
1 1 2 2 3, 1 (1) : 1  
1 1 2 3 1, 1 (1) : 1  
1 1 2 3 2, 1 (1) : 1  
1 1 2 3 3, 1 (1) : 1  
1 1 3 1 1, 1 (1) : 1  
1 1 3 1 2, 1 (1) : 1  
1 1 3 1 3, 1 (1) : 1  
1 1 3 2 1, 1 (1) : 1  
1 1 3 2 2, 1 (1) : 1  
1 1 3 2 3, 1 (1) : 1  
1 1 3 3 1, 1 (1) : 1  
1 1 3 3 2, 1 (1) : 1  
1 1 3 3 3, 1 (1) : 1  
1 2 1 1 1, 1 (1) : 1  
1 2 1 1 2, 1 (1) : 1  
1 2 1 1 3, 1 (1) : 1  
1 2 1 2 1, 1 (1) : 1  
1 2 1 2 2, 1 (1) : 1  
1 2 1 2 3, 1 (1) : 1  
1 2 1 3 1, 1 (1) : 1  
1 2 1 3 2, 1 (1) : 1  
1 2 1 3 3, 1 (1) : 1  
1 2 2 1 1, 1 (1) : 1  
1 2 2 1 2, 1 (1) : 1  
1 2 2 1 3, 1 (1) : 1  
1 2 2 2 1, 1 (1) : 1  
1 2 2 2 2, 1 (1) : 1  
1 2 2 2 3, 1 (1) : 1  
1 2 2 3 1, 1 (1) : 1  
1 2 2 3 2, 1 (1) : 1  
1 2 2 3 3, 1 (1) : 1



1 2 3 1 1, 1 (1) : 1  
1 2 3 1 2, 1 (1) : 1  
1 2 3 1 3, 1 (1) : 1  
1 2 3 2 1, 1 (1) : 1  
1 2 3 2 2, 1 (1) : 1  
1 2 3 2 3, 1 (1) : 1  
1 2 3 3 1, 1 (1) : 1  
1 2 3 3 2, 1 (1) : 1  
1 2 3 3 3, 2 (1) : 1  
1 3 1 1 1, 1 (1) : 1  
1 3 1 1 2, 1 (1) : 1  
1 3 1 1 3, 1 (1) : 1  
1 3 1 2 1, 1 (1) : 1  
1 3 1 2 2, 1 (1) : 1  
1 3 1 2 3, 1 (1) : 1  
1 3 1 3 1, 1 (1) : 1  
1 3 1 3 2, 1 (1) : 1  
1 3 1 3 3, 1 (1) : 1  
1 3 2 1 1, 1 (1) : 1  
1 3 2 1 2, 1 (1) : 1  
1 3 2 1 3, 1 (1) : 1  
1 3 2 2 1, 1 (1) : 1  
1 3 2 2 2, 1 (1) : 1  
1 3 2 2 3, 1 (1) : 1  
1 3 2 3 1, 1 (1) : 1  
1 3 2 3 2, 1 (1) : 1  
1 3 2 3 3, 2 (1) : 1  
1 3 3 1 1, 1 (1) : 1  
1 3 3 1 2, 1 (1) : 1  
1 3 3 1 3, 1 (1) : 1  
1 3 3 2 1, 1 (1) : 1  
1 3 3 2 2, 1 (1) : 1  
1 3 3 2 3, 2 (1) : 1  
1 3 3 3 1, 1 (1) : 1  
1 3 3 3 2, 2 (1) : 1  
1 3 3 3 3, 3 (1) : 1  
2 1 1 1 1, 1 (1) : 1  
2 1 1 1 2, 1 (1) : 1  
2 1 1 1 3, 1 (1) : 1  
2 1 1 2 1, 1 (1) : 1  
2 1 1 2 2, 1 (1) : 1  
2 1 1 2 3, 1 (1) : 1  
2 1 1 3 1, 1 (1) : 1  
2 1 1 3 2, 1 (1) : 1  
2 1 1 3 3, 1 (1) : 1  
2 1 2 1 1, 1 (1) : 1  
2 1 2 1 2, 1 (1) : 1  
2 1 2 1 3, 1 (1) : 1  
2 1 2 2 1, 1 (1) : 1  
2 1 2 2 2, 1 (1) : 1  
2 1 2 2 3, 1 (1) : 1  
2 1 2 3 1, 1 (1) : 1  
2 1 2 3 2, 1 (1) : 1  
2 1 2 3 3, 1 (1) : 1  
2 1 3 1 1, 1 (1) : 1  
2 1 3 1 2, 1 (1) : 1  
2 1 3 1 3, 1 (1) : 1

2 1 3 2 1, 1 (1) : 1  
2 1 3 2 2, 1 (1) : 1  
2 1 3 2 3, 1 (1) : 1  
2 1 3 3 1, 1 (1) : 1  
2 1 3 3 2, 1 (1) : 1  
2 1 3 3 3, 2 (1) : 1  
2 2 1 1 1, 1 (1) : 1  
2 2 1 1 2, 1 (1) : 1  
2 2 1 1 3, 1 (1) : 1  
2 2 1 2 1, 1 (1) : 1  
2 2 1 2 2, 1 (1) : 1  
2 2 1 2 3, 1 (1) : 1  
2 2 1 3 1, 1 (1) : 1  
2 2 1 3 2, 1 (1) : 1  
2 2 1 3 3, 1 (1) : 1  
2 2 2 1 1, 1 (1) : 1  
2 2 2 1 2, 1 (1) : 1  
2 2 2 1 3, 1 (1) : 1  
2 2 2 2 1, 1 (1) : 1  
2 2 2 2 2, 1 (1) : 1  
2 2 2 2 3, 1 (1) : 1  
2 2 2 3 1, 1 (1) : 1  
2 2 2 3 2, 1 (1) : 1  
2 2 2 3 3, 2 (1) : 1  
2 2 3 1 1, 1 (1) : 1  
2 2 3 1 2, 1 (1) : 1  
2 2 3 1 3, 1 (1) : 1  
2 2 3 2 1, 1 (1) : 1  
2 2 3 2 2, 1 (1) : 1  
2 2 3 2 3, 2 (1) : 1  
2 2 3 3 1, 1 (1) : 1  
2 2 3 3 2, 2 (1) : 1  
2 2 3 3 3, 3 (1) : 1  
2 3 1 1 1, 1 (1) : 1  
2 3 1 1 2, 1 (1) : 1  
2 3 1 1 3, 1 (1) : 1  
2 3 1 2 1, 1 (1) : 1  
2 3 1 2 2, 1 (1) : 1  
2 3 1 2 3, 1 (1) : 1  
2 3 1 3 1, 1 (1) : 1  
2 3 1 3 2, 1 (1) : 1  
2 3 1 3 3, 2 (1) : 1  
2 3 2 1 1, 1 (1) : 1  
2 3 2 1 2, 1 (1) : 1  
2 3 2 1 3, 1 (1) : 1  
2 3 2 2 1, 1 (1) : 1  
2 3 2 2 2, 1 (1) : 1  
2 3 2 2 3, 2 (1) : 1  
2 3 2 3 1, 1 (1) : 1  
2 3 2 3 2, 2 (1) : 1  
2 3 2 3 3, 3 (1) : 1  
2 3 3 1 1, 1 (1) : 1  
2 3 3 1 2, 1 (1) : 1  
2 3 3 1 3, 2 (1) : 1  
2 3 3 2 1, 1 (1) : 1  
2 3 3 2 2, 2 (1) : 1  
2 3 3 2 3, 3 (1) : 1

2 3 3 3 1, 2 (1) : 1  
2 3 3 3 2, 3 (1) : 1  
2 3 3 3 3, 3 (1) : 1  
3 1 1 1 1, 1 (1) : 1  
3 1 1 1 2, 1 (1) : 1  
3 1 1 1 3, 1 (1) : 1  
3 1 1 2 1, 1 (1) : 1  
3 1 1 2 2, 1 (1) : 1  
3 1 1 2 3, 1 (1) : 1  
3 1 1 3 1, 1 (1) : 1  
3 1 1 3 2, 1 (1) : 1  
3 1 1 3 3, 1 (1) : 1  
3 1 2 1 1, 1 (1) : 1  
3 1 2 1 2, 1 (1) : 1  
3 1 2 1 3, 1 (1) : 1  
3 1 2 2 1, 1 (1) : 1  
3 1 2 2 2, 1 (1) : 1  
3 1 2 2 3, 1 (1) : 1  
3 1 2 3 1, 1 (1) : 1  
3 1 2 3 2, 1 (1) : 1  
3 1 2 3 3, 2 (1) : 1  
3 1 3 1 1, 1 (1) : 1  
3 1 3 1 2, 1 (1) : 1  
3 1 3 1 3, 1 (1) : 1  
3 1 3 2 1, 1 (1) : 1  
3 1 3 2 2, 1 (1) : 1  
3 1 3 2 3, 2 (1) : 1  
3 1 3 3 1, 1 (1) : 1  
3 1 3 3 2, 2 (1) : 1  
3 1 3 3 3, 3 (1) : 1  
3 2 1 1 1, 1 (1) : 1  
3 2 1 1 2, 1 (1) : 1  
3 2 1 1 3, 1 (1) : 1  
3 2 1 2 1, 1 (1) : 1  
3 2 1 2 2, 1 (1) : 1  
3 2 1 2 3, 1 (1) : 1  
3 2 1 3 1, 1 (1) : 1  
3 2 1 3 2, 1 (1) : 1  
3 2 1 3 3, 2 (1) : 1  
3 2 2 1 1, 1 (1) : 1  
3 2 2 1 2, 1 (1) : 1  
3 2 2 1 3, 1 (1) : 1  
3 2 2 2 1, 1 (1) : 1  
3 2 2 2 2, 1 (1) : 1  
3 2 2 2 3, 2 (1) : 1  
3 2 2 3 1, 1 (1) : 1  
3 2 2 3 2, 2 (1) : 1  
3 2 2 3 3, 3 (1) : 1  
3 2 3 1 1, 1 (1) : 1  
3 2 3 1 2, 1 (1) : 1  
3 2 3 1 3, 2 (1) : 1  
3 2 3 2 1, 1 (1) : 1  
3 2 3 2 2, 2 (1) : 1  
3 2 3 2 3, 3 (1) : 1  
3 2 3 3 1, 2 (1) : 1  
3 2 3 3 2, 3 (1) : 1  
3 2 3 3 3, 3 (1) : 1

```

3 3 1 1 1, 1 (1) : 1
3 3 1 1 2, 1 (1) : 1
3 3 1 1 3, 1 (1) : 1
3 3 1 2 1, 1 (1) : 1
3 3 1 2 2, 1 (1) : 1
3 3 1 2 3, 2 (1) : 1
3 3 1 3 1, 1 (1) : 1
3 3 1 3 2, 2 (1) : 1
3 3 1 3 3, 3 (1) : 1
3 3 2 1 1, 1 (1) : 1
3 3 2 1 2, 1 (1) : 1
3 3 2 1 3, 2 (1) : 1
3 3 2 2 1, 1 (1) : 1
3 3 2 2 2, 2 (1) : 1
3 3 2 2 3, 3 (1) : 1
3 3 2 3 1, 2 (1) : 1
3 3 2 3 2, 3 (1) : 1
3 3 2 3 3, 3 (1) : 1
3 3 3 1 1, 1 (1) : 1
3 3 3 1 2, 2 (1) : 1
3 3 3 1 3, 3 (1) : 1
3 3 3 2 1, 2 (1) : 1
3 3 3 2 2, 3 (1) : 1
3 3 3 2 3, 3 (1) : 1
3 3 3 3 1, 3 (1) : 1
3 3 3 3 2, 3 (1) : 1
3 3 3 3 3, 3 (1) : 1

```

**MATLAB code for a generic FRAM function with five inputs or aspects and one output (reduced with rough sets):**

```

[System]
Name='A generic FRAM Function'
Type='mamdani'
Version=2.0
NumInputs=5
NumOutputs=1
NumRules=90
AndMethod='min'
OrMethod='max'
ImpMethod='min'
AggMethod='max'
DefuzzMethod='centroid'

[Input1]
Name='Input_1'
Range=[0 1.5]
NumMFs=3
MF1='Highly.variable': 'trimf', [0 0 0.75]
MF2='Variable': 'trimf', [0.5 0.75 1]
MF3='Non.variable': 'trimf', [0.75 1.5 1.5]

```

```
[Input2]
Name='Input_2'
Range=[0 1.5]
NumMFs=3
MF1='Highly.variable': 'trimf', [0 0 0.75]
MF2='Variable': 'trimf', [0.5 0.75 1]
MF3='Non.variable': 'trimf', [0.75 1.5 1.5]
```

```
[Input3]
Name='Input_3'
Range=[0 1.5]
NumMFs=3
MF1='Highly.variable': 'trimf', [0 0 0.75]
MF2='Variable': 'trimf', [0.5 0.75 1]
MF3='Non.variable': 'trimf', [0.75 1.5 1.5]
```

```
[Input4]
Name='Input_4'
Range=[0 1.5]
NumMFs=3
MF1='Highly.variable': 'trimf', [0 0 0.75]
MF2='Variable': 'trimf', [0.5 0.75 1]
MF3='Non.variable': 'trimf', [0.75 1.5 1.5]
```

```
[Input5]
Name='IVF'
Range=[0 1.5]
NumMFs=3
MF1='Highly.variable': 'trimf', [0 0 0.75]
MF2='Variable': 'trimf', [0.5 0.75 1]
MF3='Non.variable': 'trimf', [0.75 1.5 1.5]
```

```
[Output1]
Name='Output_1'
Range=[0 1.5]
NumMFs=3
MF1='Highly.variable': 'trimf', [0 0 0.75]
MF2='Variable': 'trimf', [0.5 0.75 1]
MF3='Non.variable': 'trimf', [0.75 1.5 1.5]
```

```
[Rules]
1 0 1 0 0, 1 (1) : 1
0 1 0 1 0, 1 (1) : 1
1 1 0 0 0, 1 (1) : 1
1 0 0 1 0, 1 (1) : 1
0 0 1 1 0, 1 (1) : 1
0 1 1 0 0, 1 (1) : 1
0 0 1 0 1, 1 (1) : 1
0 1 0 0 1, 1 (1) : 1
1 0 0 0 1, 1 (1) : 1
0 1 0 2 2, 1 (1) : 1
0 2 0 1 2, 1 (1) : 1
0 2 0 2 1, 1 (1) : 1
1 0 0 2 2, 1 (1) : 1
2 0 0 1 2, 1 (1) : 1
2 0 0 2 1, 1 (1) : 1
```

0 0 1 2 2, 1 (1) : 1  
0 0 2 1 2, 1 (1) : 1  
0 0 2 2 1, 1 (1) : 1  
0 0 0 1 1, 1 (1) : 1  
1 0 2 0 2, 1 (1) : 1  
2 0 1 0 2, 1 (1) : 1  
2 0 2 0 1, 1 (1) : 1  
0 1 2 0 2, 1 (1) : 1  
0 2 1 0 2, 1 (1) : 1  
0 2 2 0 1, 1 (1) : 1  
1 0 2 2 0, 1 (1) : 1  
2 0 1 2 0, 1 (1) : 1  
2 0 2 1 0, 1 (1) : 1  
0 1 2 2 0, 1 (1) : 1  
0 2 1 2 0, 1 (1) : 1  
0 2 2 1 0, 1 (1) : 1  
1 2 0 0 2, 1 (1) : 1  
2 1 0 0 2, 1 (1) : 1  
2 2 0 0 1, 1 (1) : 1  
1 2 0 2 0, 1 (1) : 1  
2 1 0 2 0, 1 (1) : 1  
2 2 0 1 0, 1 (1) : 1  
1 2 2 0 0, 1 (1) : 1  
2 1 2 0 0, 1 (1) : 1  
2 2 1 0 0, 1 (1) : 1  
0 2 2 2 2, 1 (1) : 1  
0 3 3 3 3, 3 (1) : 1  
1 2 3 3 3, 2 (1) : 1  
1 3 2 3 3, 2 (1) : 1  
1 3 3 2 3, 2 (1) : 1  
1 3 3 3 2, 2 (1) : 1  
2 1 3 3 3, 2 (1) : 1  
2 2 2 3 3, 2 (1) : 1  
2 2 3 2 3, 2 (1) : 1  
2 2 3 3 2, 2 (1) : 1  
2 2 3 3 3, 3 (1) : 1  
2 3 1 3 3, 2 (1) : 1  
2 3 2 2 3, 2 (1) : 1  
2 3 2 3 2, 2 (1) : 1  
2 3 2 3 3, 3 (1) : 1  
2 3 3 1 3, 2 (1) : 1  
2 3 3 2 2, 2 (1) : 1  
2 3 3 2 3, 3 (1) : 1  
2 3 3 3 1, 2 (1) : 1  
2 3 3 3 2, 3 (1) : 1  
3 1 2 3 3, 2 (1) : 1  
3 1 3 2 3, 2 (1) : 1  
3 1 3 3 2, 2 (1) : 1  
3 2 1 3 3, 2 (1) : 1  
3 2 2 2 3, 2 (1) : 1  
3 2 2 3 2, 2 (1) : 1  
3 2 2 3 3, 3 (1) : 1  
3 2 3 1 3, 2 (1) : 1  
3 2 3 2 2, 2 (1) : 1  
3 2 3 2 3, 3 (1) : 1  
3 2 3 3 1, 2 (1) : 1  
3 2 3 3 2, 3 (1) : 1

3 3 1 2 3, 2 (1) : 1  
3 3 1 3 2, 2 (1) : 1  
3 3 2 1 3, 2 (1) : 1  
3 3 2 2 2, 2 (1) : 1  
3 3 2 2 3, 3 (1) : 1  
3 3 2 3 1, 2 (1) : 1  
3 3 2 3 2, 3 (1) : 1  
3 3 3 1 2, 2 (1) : 1  
3 3 3 2 1, 2 (1) : 1  
3 3 3 2 2, 3 (1) : 1  
2 0 2 2 2, 1 (1) : 1  
3 0 3 3 3, 3 (1) : 1  
2 2 0 2 2, 1 (1) : 1  
3 3 0 3 3, 3 (1) : 1  
2 2 2 0 2, 1 (1) : 1  
3 3 3 0 3, 3 (1) : 1  
2 2 2 2 0, 1 (1) : 1  
3 3 3 3 0, 3 (1) : 1

## Rough sets code:

```
% Output from ROSETTA, Hussein 2020.01.13 15:57:31
```

```
%
```

```
% DiscernibilityFunctionExporter
```

```
% {DISCERNIBILITY=Object; SELECTION=All; SIMPLIFY=T; IDG=F; NAMES=F; MODULO.DECISION=F;  
FILENAME=Undefined}
```

```
%
```

```
% Data (5 inputs)
```

```
f(0) =
```

```
(A5) *
```

```
(A4) *
```

```
(A3) *
```

```
(A2) *
```

```
(A1)
```

```
end
```

```
f(1) =
```

```
(A5) *
```

```
(A4) *
```

```
(A3) *
```

```
(A2) *
```

```
(A1)
```

```
end
```

```
f(2) =
```

```
(A5) *
```

```
(A4) *
```



(A3) \*  
(A2) \*  
(A1)  
end

f(3) =  
(A4) \*  
(A5) \*  
(A3) \*  
(A2) \*  
(A1)  
end

f(4) =  
(A4) \*  
(A5) \*  
(A3) \*  
(A2) \*  
(A1)  
end

f(5) =  
(A4) \*  
(A5) \*  
(A3) \*  
(A2) \*  
(A1)  
end

f(6) =

(A4) \*

(A5) \*

(A3) \*

(A2) \*

(A1)

end

f(7) =

(A4) \*

(A5) \*

(A3) \*

(A2) \*

(A1)

end

f(8) =

(A5) \*

(A4) \*

(A3) \*

(A2) \*

(A1)

end

f(9) =

(A3) \*

(A5) \*

(A4) \*

(A2) \*

(A1)

end

f(10) =

(A3) \*

(A5) \*

(A4) \*

(A2) \*

(A1)

end

f(11) =

(A3) \*

(A4) \*

(A5) \*

(A2) \*

(A1)

end

f(12) =

(A3) \*

(A4) \*

(A5) \*

(A2) \*

(A1)

end

f(13) =

(A3) \*

(A4) \*

(A5) \*

(A2) \*

(A1)

end

f(14) =

(A3) \*

(A4) \*

(A5) \*

(A2) \*

(A1)

end

f(15) =

(A3) \*

(A4) \*

(A5) \*

(A2) \*

(A1)

end

f(16) =

(A3) \*

(A4) \*

(A5) \*

(A2) \*

(A1)

end

f(17) =

(A3) \*

(A5) \*

(A4) \*

(A2) \*

(A1)

end

f(18) =

(A3) \*

(A5) \*

(A4) \*

(A2) \*

(A1)

end

f(19) =

(A3) \*

(A5) \*

(A4) \*

(A2) \*

(A1)

end

f(20) =

(A3) \*

(A4) \*

(A5) \*

(A2) \*  
(A1)  
end

f(21) =  
(A3) \*  
(A4) \*  
(A5) \*  
(A2) \*  
(A1)  
end

f(22) =  
(A3) \*  
(A4) \*  
(A5) \*  
(A2) \*  
(A1)  
end

f(23) =  
(A3) \*  
(A4) \*  
(A5) \*  
(A2) \*  
(A1)  
end

f(24) =

(A3) \*

(A4) \*

(A5) \*

(A2) \*

(A1)

end

f(25) =

(A3) \*

(A4) \*

(A5) \*

(A2 + D) \*

(A1 + D)

end

f(26) =

(A4) \*

(A5) \*

(A3) \*

(A2) \*

(A1)

end

f(27) =

(A2) \*

(A5) \*

(A4) \*

(A3) \*

(A1)

end

f(28) =

(A2) \*

(A5) \*

(A4) \*

(A3) \*

(A1)

end

f(29) =

(A2) \*

(A4) \*

(A5) \*

(A3) \*

(A1)

end

f(30) =

(A2) \*

(A4) \*

(A5) \*

(A3) \*

(A1)

end

f(31) =

(A2) \*

(A4) \*



(A5) \*  
(A3) \*  
(A1)  
end

f(32) =  
(A2) \*  
(A4) \*  
(A5) \*  
(A3) \*  
(A1)  
end

f(33) =  
(A2) \*  
(A4) \*  
(A5) \*  
(A3) \*  
(A1)  
end

f(34) =  
(A2) \*  
(A4) \*  
(A5) \*  
(A3) \*  
(A1)  
end

f(35) =

(A2) \*

(A3) \*

(A5) \*

(A4) \*

(A1)

end

f(36) =

(A2) \*

(A3) \*

(A5) \*

(A4) \*

(A1)

end

f(37) =

(A2) \*

(A3) \*

(A5) \*

(A4) \*

(A1)

end

f(38) =

(A2) \*

(A3) \*

(A4) \*

(A5) \*

(A1)

end

f(39) =

(A2) \*

(A3) \*

(A4) \*

(A5) \*

(A1)

end

f(40) =

(A2) \*

(A3) \*

(A4) \*

(A5) \*

(A1)

end

f(41) =

(A2) \*

(A3) \*

(A4) \*

(A5) \*

(A1)

end

f(42) =

(A2) \*

(A3) \*

(A4) \*

(A5) \*

(A1)

end

f(43) =

(A2) \*

(A3) \*

(A4) \*

(A5) \*

(A1 + D)

end

f(44) =

(A2) \*

(A3) \*

(A5) \*

(A4) \*

(A1)

end

f(45) =

(A2) \*

(A3) \*

(A5) \*

(A4) \*

(A1)

end

f(46) =

(A2) \*

(A3) \*

(A5) \*

(A4) \*

(A1)

end

f(47) =

(A2) \*

(A3) \*

(A4) \*

(A5) \*

(A1)

end

f(48) =

(A2) \*

(A3) \*

(A4) \*

(A5) \*

(A1)

end

f(49) =

(A2) \*

(A3) \*

(A4) \*

(A5) \*

(A1 + D)

end

f(50) =

(A2) \*

(A3) \*

(A4) \*

(A5) \*

(A1)

end

f(51) =

(A2) \*

(A3) \*

(A4) \*

(A5) \*

(A1 + D)

end

f(52) =

(A2 + D) \*

(A3 + D) \*

(A4 + D) \*

(A5 + D) \*

(A2 + A3) \*

(A2 + A4) \*

(A2 + A5) \*

(A1 + A2) \*

$(A1 + A3) *$

$(A1 + A4) *$

$(A1 + A5) *$

$(A1 + D)$

end

f(53) =

$(A2) *$

$(A5) *$

$(A4) *$

$(A3) *$

$(A1)$

end

f(54) =

$(A2) *$

$(A5) *$

$(A4) *$

$(A3) *$

$(A1)$

end

f(55) =

$(A2) *$

$(A5) *$

$(A4) *$

$(A3) *$

$(A1)$

end

f(56) =

(A2) \*

(A4) \*

(A5) \*

(A3) \*

(A1)

end

f(57) =

(A2) \*

(A4) \*

(A5) \*

(A3) \*

(A1)

end

f(58) =

(A2) \*

(A4) \*

(A5) \*

(A3) \*

(A1)

end

f(59) =

(A2) \*

(A4) \*

(A5) \*



(A3) \*

(A1)

end

f(60) =

(A2) \*

(A4) \*

(A5) \*

(A3) \*

(A1)

end

f(61) =

(A2) \*

(A4) \*

(A5) \*

(A3 + D) \*

(A1 + D)

end

f(62) =

(A2) \*

(A3) \*

(A5) \*

(A4) \*

(A1)

end

f(63) =

(A2) \*

(A3) \*

(A5) \*

(A4) \*

(A1)

end

f(64) =

(A2) \*

(A3) \*

(A5) \*

(A4) \*

(A1)

end

f(65) =

(A2) \*

(A3) \*

(A4) \*

(A5) \*

(A1)

end

f(66) =

(A2) \*

(A3) \*

(A4) \*

(A5) \*

(A1)

end

f(67) =

(A2) \*

(A3) \*

(A4) \*

(A5) \*

(A1 + D)

end

f(68) =

(A2) \*

(A3) \*

(A4) \*

(A5) \*

(A1)

end

f(69) =

(A2) \*

(A3) \*

(A4) \*

(A5) \*

(A1 + D)

end

f(70) =

(A2 + D) \*

(A2 + A3) \*

(A3 + D) \*  
(A4 + D) \*  
(A5 + D) \*  
(A3 + A4) \*  
(A3 + A5) \*  
(A1 + A2) \*  
(A1 + A3) \*  
(A1 + A4) \*  
(A1 + A5) \*  
(A1 + D)

end

f(71) =

(A2) \*  
(A3) \*  
(A5) \*  
(A4) \*  
(A1)

end

f(72) =

(A2) \*  
(A3) \*  
(A5) \*  
(A4) \*  
(A1)

end

f(73) =

(A2) \*

(A3) \*

(A5) \*

(A4 + D) \*

(A1 + D)

end

f(74) =

(A2) \*

(A3) \*

(A4) \*

(A5) \*

(A1)

end

f(75) =

(A2) \*

(A3) \*

(A4) \*

(A5) \*

(A1 + D)

end

f(76) =

(A2 + D) \*

(A2 + A4) \*

(A3 + D) \*

(A3 + A4) \*

(A4 + D) \*

$$(A5 + D) *$$

$$(A4 + A5) *$$

$$(A1 + A2) *$$

$$(A1 + A3) *$$

$$(A1 + A4) *$$

$$(A1 + A5) *$$

$$(A1 + D)$$

end

$$f(77) =$$

$$(A2) *$$

$$(A3) *$$

$$(A4) *$$

$$(A5 + D) *$$

$$(A1 + D)$$

end

$$f(78) =$$

$$(A2 + D) *$$

$$(A2 + A5) *$$

$$(A3 + D) *$$

$$(A3 + A5) *$$

$$(A4 + D) *$$

$$(A4 + A5) *$$

$$(A5 + D) *$$

$$(A1 + A2) *$$

$$(A1 + A3) *$$

$$(A1 + A4) *$$

$$(A1 + A5) *$$

$(A1 + D)$

end

f(79) =

$(A2 + D) *$

$(A3 + D) *$

$(A4 + D) *$

$(A5 + D) *$

$(A1)$

end

f(80) =

$(A3) *$

$(A5) *$

$(A4) *$

$(A2) *$

$(A1)$

end

f(81) =

$(A1) *$

$(A5) *$

$(A4) *$

$(A3) *$

$(A2)$

end

f(82) =

$(A1) *$

(A5) \*  
(A4) \*  
(A3) \*  
(A2)  
end

f(83) =  
(A1) \*  
(A4) \*  
(A5) \*  
(A3) \*  
(A2)  
end

f(84) =  
(A1) \*  
(A4) \*  
(A5) \*  
(A3) \*  
(A2)  
end

f(85) =  
(A1) \*  
(A4) \*  
(A5) \*  
(A3) \*  
(A2)  
end



f(86) =

(A1) \*

(A4) \*

(A5) \*

(A3) \*

(A2)

end

f(87) =

(A1) \*

(A4) \*

(A5) \*

(A3) \*

(A2)

end

f(88) =

(A1) \*

(A4) \*

(A5) \*

(A3) \*

(A2)

end

f(89) =

(A1) \*

(A3) \*

(A5) \*

(A4) \*

(A2)

end

f(90) =

(A1) \*

(A3) \*

(A5) \*

(A4) \*

(A2)

end

f(91) =

(A1) \*

(A3) \*

(A5) \*

(A4) \*

(A2)

end

f(92) =

(A1) \*

(A3) \*

(A4) \*

(A5) \*

(A2)

end

f(93) =

(A1) \*

(A3) \*

(A4) \*

(A5) \*

(A2)

end

f(94) =

(A1) \*

(A3) \*

(A4) \*

(A5) \*

(A2)

end

f(95) =

(A1) \*

(A3) \*

(A4) \*

(A5) \*

(A2)

end

f(96) =

(A1) \*

(A3) \*

(A4) \*

(A5) \*

(A2)

end

f(97) =

(A1) \*

(A3) \*

(A4) \*

(A5) \*

(A2 + D)

end

f(98) =

(A1) \*

(A3) \*

(A5) \*

(A4) \*

(A2)

end

f(99) =

(A1) \*

(A3) \*

(A5) \*

(A4) \*

(A2)

end

f(100) =

(A1) \*

(A3) \*

(A5) \*

(A4) \*

(A2)

end

f(101) =

(A1) \*

(A3) \*

(A4) \*

(A5) \*

(A2)

end

f(102) =

(A1) \*

(A3) \*

(A4) \*

(A5) \*

(A2)

end

f(103) =

(A1) \*

(A3) \*

(A4) \*

(A5) \*

(A2 + D)

end

f(104) =

(A1) \*

(A3) \*

(A4) \*

(A5) \*

(A2)

end

f(105) =

(A1) \*

(A3) \*

(A4) \*

(A5) \*

(A2 + D)

end

f(106) =

(A1 + D) \*

(A1 + A2) \*

(A3 + D) \*

(A4 + D) \*

(A5 + D) \*

(A2 + A3) \*

(A2 + A4) \*

(A2 + A5) \*

(A2 + D) \*

(A1 + A3) \*

(A1 + A4) \*

(A1 + A5)

end

f(107) =

(A1) \*

(A2) \*

(A5) \*

(A4) \*

(A3)

end

f(108) =

(A1) \*

(A2) \*

(A5) \*

(A4) \*

(A3)

end

f(109) =

(A1) \*

(A2) \*

(A5) \*

(A4) \*

(A3)

end

f(110) =

(A1) \*

(A2) \*

(A4) \*  
(A5) \*  
(A3)  
end

f(111) =  
(A1) \*  
(A2) \*  
(A4) \*  
(A5) \*  
(A3)  
end

f(112) =  
(A1) \*  
(A2) \*  
(A4) \*  
(A5) \*  
(A3)  
end

f(113) =  
(A1) \*  
(A2) \*  
(A4) \*  
(A5) \*  
(A3)  
end



f(114) =

(A1) \*

(A2) \*

(A4) \*

(A5) \*

(A3)

end

f(115) =

(A1) \*

(A2) \*

(A4) \*

(A5) \*

(A3 + D)

end

f(116) =

(A1) \*

(A2) \*

(A3) \*

(A5) \*

(A4)

end

f(117) =

(A1) \*

(A2) \*

(A3) \*

(A5) \*

(A4)

end

f(118) =

(A1) \*

(A2) \*

(A3) \*

(A5) \*

(A4)

end

f(119) =

(A1) \*

(A2) \*

(A3) \*

(A4) \*

(A5)

end

f(120) =

(A1) \*

(A2) \*

(A3) \*

(A4) \*

(A5)

end

f(121) =

(A1) \*

(A2) \*

(A3) \*

(A4) \*

(A5)

end

f(122) =

(A1) \*

(A2) \*

(A3) \*

(A4) \*

(A5)

end

f(123) =

(A1) \*

(A2) \*

(A3) \*

(A4) \*

(A5)

end

f(124) =

(A1 + D) \*

(A1 + A3) \*

(A1 + A2) \*

(A2 + D) \*

(A2 + A3) \*

(A3 + D) \*

(A4 + D) \*  
(A5 + D) \*  
(A3 + A4) \*  
(A3 + A5) \*  
(A2 + A4) \*  
(A2 + A5) \*  
(A1 + A4) \*  
(A1 + A5)  
end

f(125) =  
(A1) \*  
(A2) \*  
(A3) \*  
(A5) \*  
(A4)  
end

f(126) =  
(A1) \*  
(A2) \*  
(A3) \*  
(A5) \*  
(A4)  
end

f(127) =  
(A1) \*  
(A2) \*

(A3) \*

(A5) \*

(A4 + D)

end

f(128) =

(A1) \*

(A2) \*

(A3) \*

(A4) \*

(A5)

end

f(129) =

(A1) \*

(A2) \*

(A3) \*

(A4) \*

(A5)

end

f(130) =

(A1 + D) \*

(A1 + A4) \*

(A1 + A2) \*

(A2 + D) \*

(A2 + A4) \*

(A3 + D) \*

(A3 + A4) \*

$$(A4 + D) *$$

$$(A5 + D) *$$

$$(A4 + A5) *$$

$$(A2 + A3) *$$

$$(A2 + A5) *$$

$$(A1 + A3) *$$

$$(A1 + A5)$$

end

$$f(131) =$$

$$(A1) *$$

$$(A2) *$$

$$(A3) *$$

$$(A4) *$$

$$(A5 + D)$$

end

$$f(132) =$$

$$(A1 + D) *$$

$$(A1 + A5) *$$

$$(A1 + A2) *$$

$$(A2 + D) *$$

$$(A2 + A5) *$$

$$(A3 + D) *$$

$$(A3 + A5) *$$

$$(A4 + D) *$$

$$(A4 + A5) *$$

$$(A5 + D) *$$

$$(A2 + A3) *$$

$(A2 + A4) *$

$(A1 + A3) *$

$(A1 + A4)$

end

f(133) =

$(A2) *$

$(A4 + D) *$

$(A5 + D) *$

$(A3 + D) *$

$(A1)$

end

f(134) =

$(A1) *$

$(A2) *$

$(A5) *$

$(A4) *$

$(A3)$

end

f(135) =

$(A1) *$

$(A2) *$

$(A5) *$

$(A4) *$

$(A3)$

end

f(136) =

(A1) \*

(A2) \*

(A5) \*

(A4) \*

(A3)

end

f(137) =

(A1) \*

(A2) \*

(A4) \*

(A5) \*

(A3)

end

f(138) =

(A1) \*

(A2) \*

(A4) \*

(A5) \*

(A3)

end

f(139) =

(A1) \*

(A2) \*

(A4) \*

(A5) \*



(A3 + D)

end

f(140) =

(A1) \*

(A2) \*

(A4) \*

(A5) \*

(A3)

end

f(141) =

(A1) \*

(A2) \*

(A4) \*

(A5) \*

(A3 + D)

end

f(142) =

(A1 + D) \*

(A1 + A3) \*

(A2 + D) \*

(A2 + A3) \*

(A4 + D) \*

(A5 + D) \*

(A3 + A4) \*

(A3 + A5) \*

(A3 + D) \*

$(A1 + A2) *$

$(A1 + A4) *$

$(A1 + A5)$

end

f(143) =

$(A1) *$

$(A2) *$

$(A3) *$

$(A5) *$

$(A4)$

end

f(144) =

$(A1) *$

$(A2) *$

$(A3) *$

$(A5) *$

$(A4)$

end

f(145) =

$(A1) *$

$(A2) *$

$(A3) *$

$(A5) *$

$(A4 + D)$

end

f(146) =

(A1) \*

(A2) \*

(A3) \*

(A4) \*

(A5)

end

f(147) =

(A1) \*

(A2) \*

(A3) \*

(A4) \*

(A5)

end

f(148) =

(A1 + D) \*

(A1 + A4) \*

(A1 + A3) \*

(A2 + D) \*

(A2 + A4) \*

(A2 + A3) \*

(A3 + D) \*

(A3 + A4) \*

(A4 + D) \*

(A5 + D) \*

(A4 + A5) \*

(A3 + A5) \*

$(A1 + A2) *$   
 $(A1 + A5)$   
end

f(149) =  
 $(A1) *$   
 $(A2) *$   
 $(A3) *$   
 $(A4) *$   
 $(A5 + D)$   
end

f(150) =  
 $(A1 + D) *$   
 $(A1 + A5) *$   
 $(A1 + A3) *$   
 $(A2 + D) *$   
 $(A2 + A5) *$   
 $(A2 + A3) *$   
 $(A3 + D) *$   
 $(A3 + A5) *$   
 $(A4 + D) *$   
 $(A4 + A5) *$   
 $(A5 + D) *$   
 $(A3 + A4) *$   
 $(A1 + A2) *$   
 $(A1 + A4)$   
end

f(151) =  
(A3) \*  
(A5 + D) \*  
(A2 + D) \*  
(A4 + D) \*  
(A1)  
end

f(152) =  
(A1) \*  
(A2) \*  
(A3) \*  
(A5) \*  
(A4)  
end

f(153) =  
(A1) \*  
(A2) \*  
(A3) \*  
(A5) \*  
(A4 + D)  
end

f(154) =  
(A1 + D) \*  
(A1 + A4) \*  
(A2 + D) \*  
(A2 + A4) \*

(A3 + D) \*  
(A3 + A4) \*  
(A5 + D) \*  
(A4 + A5) \*  
(A4 + D) \*  
(A1 + A2) \*  
(A1 + A3) \*  
(A1 + A5)  
end

f(155) =

(A1) \*  
(A2) \*  
(A3) \*  
(A4) \*  
(A5 + D)  
end

f(156) =

(A1 + D) \*  
(A1 + A5) \*  
(A1 + A4) \*  
(A2 + D) \*  
(A2 + A5) \*  
(A2 + A4) \*  
(A3 + D) \*  
(A3 + A5) \*  
(A3 + A4) \*  
(A4 + D) \*

$(A4 + A5) *$

$(A5 + D) *$

$(A1 + A2) *$

$(A1 + A3)$

end

f(157) =

$(A4) *$

$(A3 + D) *$

$(A2 + D) *$

$(A5 + D) *$

$(A1)$

end

f(158) =

$(A1 + D) *$

$(A1 + A5) *$

$(A2 + D) *$

$(A2 + A5) *$

$(A3 + D) *$

$(A3 + A5) *$

$(A4 + D) *$

$(A4 + A5) *$

$(A5 + D) *$

$(A1 + A2) *$

$(A1 + A3) *$

$(A1 + A4)$

end

f(159) =  
(A5) \*  
(A3 + D) \*  
(A2 + D) \*  
(A4 + D) \*  
(A1)  
end

f(160) =  
(A1) \*  
(A2) \*  
(A3) \*  
(A4) \*  
(A5)  
end

f(161) =  
(A1) \*  
(A5) \*  
(A4) \*  
(A3) \*  
(A2)  
end

f(162) =  
(A1) \*  
(A5) \*  
(A4) \*  
(A3) \*



(A2)

end

f(163) =

(A1) \*

(A5) \*

(A4) \*

(A3) \*

(A2)

end

f(164) =

(A1) \*

(A4) \*

(A5) \*

(A3) \*

(A2)

end

f(165) =

(A1) \*

(A4) \*

(A5) \*

(A3) \*

(A2)

end

f(166) =

(A1) \*

(A4) \*

(A5) \*

(A3) \*

(A2)

end

f(167) =

(A1) \*

(A4) \*

(A5) \*

(A3) \*

(A2)

end

f(168) =

(A1) \*

(A4) \*

(A5) \*

(A3) \*

(A2)

end

f(169) =

(A1) \*

(A4) \*

(A5) \*

(A3 + D) \*

(A2 + D)

end

f(170) =

(A1) \*

(A3) \*

(A5) \*

(A4) \*

(A2)

end

f(171) =

(A1) \*

(A3) \*

(A5) \*

(A4) \*

(A2)

end

f(172) =

(A1) \*

(A3) \*

(A5) \*

(A4) \*

(A2)

end

f(173) =

(A1) \*

(A3) \*

(A4) \*

(A5) \*

(A2)

end

f(174) =

(A1) \*

(A3) \*

(A4) \*

(A5) \*

(A2)

end

f(175) =

(A1) \*

(A3) \*

(A4) \*

(A5) \*

(A2 + D)

end

f(176) =

(A1) \*

(A3) \*

(A4) \*

(A5) \*

(A2)

end

f(177) =

(A1) \*

(A3) \*

(A4) \*

(A5) \*

(A2 + D)

end

f(178) =

(A1 + D) \*

(A1 + A2) \*

(A1 + A3) \*

(A3 + D) \*

(A4 + D) \*

(A5 + D) \*

(A3 + A4) \*

(A3 + A5) \*

(A2 + A3) \*

(A2 + A4) \*

(A2 + A5) \*

(A2 + D)

end

f(179) =

(A1) \*

(A3) \*

(A5) \*

(A4) \*

(A2)

end

f(180) =

(A1) \*

(A3) \*

(A5) \*

(A4) \*

(A2)

end

f(181) =

(A1) \*

(A3) \*

(A5) \*

(A4 + D) \*

(A2 + D)

end

f(182) =

(A1) \*

(A3) \*

(A4) \*

(A5) \*

(A2)

end

f(183) =

(A1) \*

(A3) \*

(A4) \*

(A5) \*

(A2 + D)

end

f(184) =

(A1 + D) \*

(A1 + A2) \*

(A1 + A4) \*

(A3 + D) \*

(A3 + A4) \*

(A4 + D) \*

(A5 + D) \*

(A4 + A5) \*

(A2 + A3) \*

(A2 + A4) \*

(A2 + A5) \*

(A2 + D)

end

f(185) =

(A1) \*

(A3) \*

(A4) \*

(A5 + D) \*

(A2 + D)

end

f(186) =

(A1 + D) \*

$(A1 + A2) *$

$(A1 + A5) *$

$(A3 + D) *$

$(A3 + A5) *$

$(A4 + D) *$

$(A4 + A5) *$

$(A5 + D) *$

$(A2 + A3) *$

$(A2 + A4) *$

$(A2 + A5) *$

$(A2 + D)$

end

f(187) =

$(A1 + D) *$

$(A5 + D) *$

$(A3 + D) *$

$(A4 + D) *$

$(A2)$

end

f(188) =

$(A1) *$

$(A2) *$

$(A5) *$

$(A4) *$

$(A3)$

end



f(189) =

(A1) \*

(A2) \*

(A5) \*

(A4) \*

(A3)

end

f(190) =

(A1) \*

(A2) \*

(A5) \*

(A4) \*

(A3)

end

f(191) =

(A1) \*

(A2) \*

(A4) \*

(A5) \*

(A3)

end

f(192) =

(A1) \*

(A2) \*

(A4) \*

(A5) \*

(A3)

end

f(193) =

(A1) \*

(A2) \*

(A4) \*

(A5) \*

(A3 + D)

end

f(194) =

(A1) \*

(A2) \*

(A4) \*

(A5) \*

(A3)

end

f(195) =

(A1) \*

(A2) \*

(A4) \*

(A5) \*

(A3 + D)

end

f(196) =

(A1 + D) \*

$(A1 + A3) *$

$(A1 + A2) *$

$(A2 + D) *$

$(A2 + A3) *$

$(A4 + D) *$

$(A5 + D) *$

$(A3 + A4) *$

$(A3 + A5) *$

$(A3 + D) *$

$(A2 + A4) *$

$(A2 + A5)$

end

f(197) =

$(A1) *$

$(A2) *$

$(A3) *$

$(A5) *$

$(A4)$

end

f(198) =

$(A1) *$

$(A2) *$

$(A3) *$

$(A5) *$

$(A4)$

end

f(199) =

(A1) \*

(A2) \*

(A3) \*

(A5) \*

(A4 + D)

end

f(200) =

(A1) \*

(A2) \*

(A3) \*

(A4) \*

(A5)

end

f(201) =

(A1) \*

(A2) \*

(A3) \*

(A4) \*

(A5)

end

f(202) =

(A1 + D) \*

(A1 + A4) \*

(A1 + A3) \*

(A1 + A2) \*

(A2 + D) \*  
(A2 + A4) \*  
(A2 + A3) \*  
(A3 + D) \*  
(A3 + A4) \*  
(A4 + D) \*  
(A5 + D) \*  
(A4 + A5) \*  
(A3 + A5) \*  
(A2 + A5)

end

f(203) =

(A1) \*  
(A2) \*  
(A3) \*  
(A4) \*  
(A5 + D)

end

f(204) =

(A1 + D) \*  
(A1 + A5) \*  
(A1 + A3) \*  
(A1 + A2) \*  
(A2 + D) \*  
(A2 + A5) \*  
(A2 + A3) \*  
(A3 + D) \*

$$(A3 + A5) *$$

$$(A4 + D) *$$

$$(A4 + A5) *$$

$$(A5 + D) *$$

$$(A3 + A4) *$$

$$(A2 + A4)$$

end

$$f(205) =$$

$$(A1 + D) *$$

$$(A5 + D) *$$

$$(A4 + D) *$$

$$(A3) *$$

$$(A2)$$

end

$$f(206) =$$

$$(A1) *$$

$$(A2) *$$

$$(A3) *$$

$$(A5) *$$

$$(A4)$$

end

$$f(207) =$$

$$(A1) *$$

$$(A2) *$$

$$(A3) *$$

$$(A5) *$$

$(A4 + D)$

end

f(208) =

$(A1 + D) *$

$(A1 + A4) *$

$(A1 + A2) *$

$(A2 + D) *$

$(A2 + A4) *$

$(A3 + D) *$

$(A3 + A4) *$

$(A5 + D) *$

$(A4 + A5) *$

$(A4 + D) *$

$(A2 + A3) *$

$(A2 + A5)$

end

f(209) =

$(A1) *$

$(A2) *$

$(A3) *$

$(A4) *$

$(A5 + D)$

end

f(210) =

$(A1 + D) *$

$(A1 + A5) *$

$(A1 + A4) *$

$(A1 + A2) *$

$(A2 + D) *$

$(A2 + A5) *$

$(A2 + A4) *$

$(A3 + D) *$

$(A3 + A5) *$

$(A3 + A4) *$

$(A4 + D) *$

$(A4 + A5) *$

$(A5 + D) *$

$(A2 + A3)$

end

f(211) =

$(A1 + D) *$

$(A3 + D) *$

$(A5 + D) *$

$(A4) *$

$(A2)$

end

f(212) =

$(A1 + D) *$

$(A1 + A5) *$

$(A1 + A2) *$

$(A2 + D) *$

$(A2 + A5) *$

$(A3 + D) *$



$$(A3 + A5) *$$

$$(A4 + D) *$$

$$(A4 + A5) *$$

$$(A5 + D) *$$

$$(A2 + A3) *$$

$$(A2 + A4)$$

end

$$f(213) =$$

$$(A1 + D) *$$

$$(A3 + D) *$$

$$(A4 + D) *$$

$$(A5) *$$

$$(A2)$$

end

$$f(214) =$$

$$(A1) *$$

$$(A2) *$$

$$(A3) *$$

$$(A4) *$$

$$(A5)$$

end

$$f(215) =$$

$$(A1) *$$

$$(A2) *$$

$$(A5) *$$

$$(A4) *$$

(A3)

end

f(216) =

(A1) \*

(A2) \*

(A5) \*

(A4) \*

(A3)

end

f(217) =

(A1) \*

(A2) \*

(A5) \*

(A4 + D) \*

(A3 + D)

end

f(218) =

(A1) \*

(A2) \*

(A4) \*

(A5) \*

(A3)

end

f(219) =

(A1) \*

(A2) \*

(A4) \*

(A5) \*

(A3 + D)

end

f(220) =

(A1 + D) \*

(A1 + A3) \*

(A1 + A4) \*

(A2 + D) \*

(A2 + A3) \*

(A2 + A4) \*

(A4 + D) \*

(A5 + D) \*

(A4 + A5) \*

(A3 + A4) \*

(A3 + A5) \*

(A3 + D)

end

f(221) =

(A1) \*

(A2) \*

(A4) \*

(A5 + D) \*

(A3 + D)

end

f(222) =

(A1 + D) \*

(A1 + A3) \*

(A1 + A5) \*

(A2 + D) \*

(A2 + A3) \*

(A2 + A5) \*

(A4 + D) \*

(A4 + A5) \*

(A5 + D) \*

(A3 + A4) \*

(A3 + A5) \*

(A3 + D)

end

f(223) =

(A1 + D) \*

(A4 + D) \*

(A2 + D) \*

(A5 + D) \*

(A3)

end

f(224) =

(A1) \*

(A2) \*

(A3) \*

(A5) \*

(A4)

end

f(225) =

(A1) \*

(A2) \*

(A3) \*

(A5) \*

(A4 + D)

end

f(226) =

(A1 + D) \*

(A1 + A4) \*

(A1 + A3) \*

(A2 + D) \*

(A2 + A4) \*

(A2 + A3) \*

(A3 + D) \*

(A3 + A4) \*

(A5 + D) \*

(A4 + A5) \*

(A4 + D) \*

(A3 + A5)

end

f(227) =

(A1) \*

(A2) \*

(A3) \*

(A4) \*

(A5 + D)

end

f(228) =

(A1 + D) \*

(A1 + A5) \*

(A1 + A4) \*

(A1 + A3) \*

(A2 + D) \*

(A2 + A5) \*

(A2 + A4) \*

(A2 + A3) \*

(A3 + D) \*

(A3 + A5) \*

(A3 + A4) \*

(A4 + D) \*

(A4 + A5) \*

(A5 + D)

end

f(229) =

(A1 + D) \*

(A5 + D) \*

(A4) \*

(A2 + D) \*

(A3)

end

f(230) =

(A1 + D) \*

(A1 + A5) \*

(A1 + A3) \*

(A2 + D) \*

(A2 + A5) \*

(A2 + A3) \*

(A3 + D) \*

(A3 + A5) \*

(A4 + D) \*

(A4 + A5) \*

(A5 + D) \*

(A3 + A4)

end

f(231) =

(A1 + D) \*

(A4 + D) \*

(A5) \*

(A2 + D) \*

(A3)

end

f(232) =

(A1) \*

(A2) \*

(A3) \*

(A4) \*

(A5)

end

f(233) =

(A1) \*

(A2) \*

(A3) \*

(A5 + D) \*

(A4 + D)

end

f(234) =

(A1 + D) \*

(A1 + A4) \*

(A1 + A5) \*

(A2 + D) \*

(A2 + A4) \*

(A2 + A5) \*

(A3 + D) \*

(A3 + A4) \*

(A3 + A5) \*

(A5 + D) \*

(A4 + A5) \*

(A4 + D)

end

f(235) =

(A1 + D) \*

(A3 + D) \*

(A2 + D) \*



(A5 + D) \*  
(A4)  
end

f(236) =  
(A1 + D) \*  
(A1 + A5) \*  
(A1 + A4) \*  
(A2 + D) \*  
(A2 + A5) \*  
(A2 + A4) \*  
(A3 + D) \*  
(A3 + A5) \*  
(A3 + A4) \*  
(A4 + D) \*  
(A4 + A5) \*  
(A5 + D)  
end

f(237) =  
(A1 + D) \*  
(A3 + D) \*  
(A5) \*  
(A2 + D) \*  
(A4)  
end

f(238) =  
(A1) \*

(A2) \*

(A3) \*

(A4) \*

(A5)

end

f(239) =

(A1 + D) \*

(A3 + D) \*

(A2 + D) \*

(A4 + D) \*

(A5)

end

f(240) =

(A1) \*

(A2) \*

(A3) \*

(A4) \*

(A5)

end

f(241) =

(A1) \*

(A2) \*

(A3) \*

(A4) \*

(A5)

end

% Reducts generated by ROSETTA.

% Exported 2020.01.13 15:58:19 by Hussein.

%

% Reducts (5 inputs)

% 26 reducts.

{A1, A3}

Support = [100 subtable(s)]

{A2, A4}

Support = [100 subtable(s)]

{A1, A2}

Support = [100 subtable(s)]

{A1, A4}

Support = [100 subtable(s)]

{A3, A4}

Support = [100 subtable(s)]

{A2, A3}

Support = [100 subtable(s)]

{A3, A5}

Support = [100 subtable(s)]

{A2, A5}

Support = [100 subtable(s)]

{A1, A5}

Support = [100 subtable(s)]

{A2, A4, A5}

Support = [100 subtable(s)]

{A1, A4, A5}

Support = [100 subtable(s)]

{A3, A4, A5}

Support = [100 subtable(s)]

{A4, A5}

Support = [100 subtable(s)]

{A1, A3, A5}

Support = [100 subtable(s)]

{A2, A3, A5}

Support = [100 subtable(s)]

{A1, A3, A4}

Support = [100 subtable(s)]

{A2, A3, A4}

Support = [100 subtable(s)]

{A1, A2, A5}

Support = [100 subtable(s)]

{A1, A2, A4}

Support = [100 subtable(s)]

{A1, A2, A3}

Support = [100 subtable(s)]

{A2, A3, A4, A5}

Support = [100 subtable(s)]

{A1, A2, A3, A4, A5}

Support = [100 subtable(s)]

{A1, A3, A4, A5}

Support = [100 subtable(s)]

{A1, A2, A4, A5}

Support = [100 subtable(s)]

{A1, A2, A3, A5}

Support = [100 subtable(s)]

{A1, A2, A3, A4}

Support = [100 subtable(s)]
